# Supplementary material for: Defect tolerant and dimension dependent ferromagnetism in MnSe2
Source: Royal Society of Chemistry journal article supplement (doi:10.1039/c9cp03112j), 2019-01-01
Supplement: c9cp03112j1.pdf [file c9cp03112j1.pdf]

## Supplementary Information

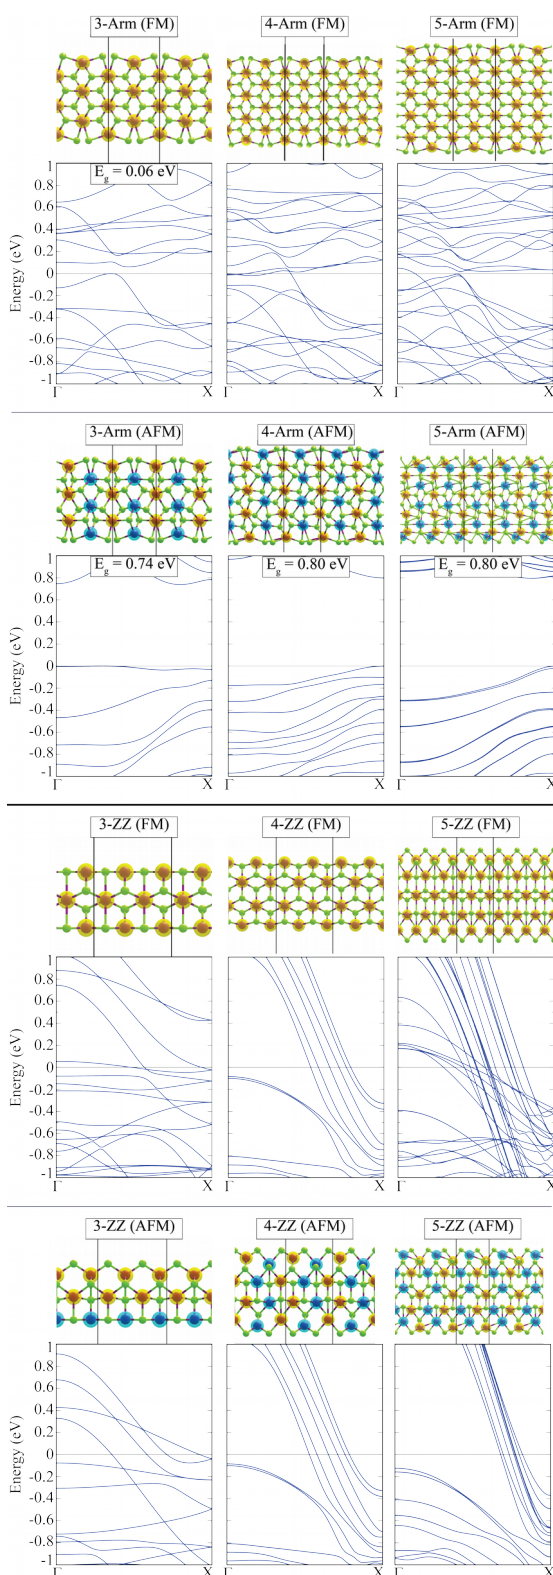

**Figure S1** Top views of spin density plots and electronic band structures of nanoribbons of  $\text{MnSe}_2$ .
